# Supplementary material for: TF-IDF Feature-Based Spam Filtering of Mobile SMS Using Machine Learning Approach
Source: Preprints.org preprint supplement (doi:10.20944/preprints202109.0251.v1), 2021-09-15
Supplement: Supplementary file 2 [file supplementary]

*This form must be completed and returned even if there are no figures or tables in your section*

**Important: Please submit the completed PVF and copies of the CPR together with your final manuscript**

Cat#

Author:

Chapter

## COPYRIGHT PERMISSION REQUEST

To: \_\_\_\_\_  
Contact: \_\_\_\_\_  
Address: \_\_\_\_\_  
City/St/Zip: \_\_\_\_\_  
Country: \_\_\_\_\_  
Full Tel No.: \_\_\_\_\_

Contact: \_\_\_\_\_  
\_\_\_\_\_  
\_\_\_\_\_  
\_\_\_\_\_  
\_\_\_\_\_

I am preparing material for: \_\_\_\_\_  
in \_\_\_\_\_

to be published by Taylor & Francis. I hereby request permission for non-exclusive world rights in this and all subsequent editions, revisions and derivative works, in English and in foreign translations, in all formats, including CD-ROM and electronic media, from the following:

I would like to include the following material from your publication:

|                   |  |
|-------------------|--|
| Title:            |  |
| Author:           |  |
| Publication Date: |  |
|                   |  |

Text title and page: \_\_\_\_\_

Figure(s): \_\_\_\_\_ Table(s): \_\_\_\_\_  
\_\_\_\_\_

Will appear in the T & F publication as text or labeled as:

Figure(s): \_\_\_\_\_ Table(s): \_\_\_\_\_  
\_\_\_\_\_

Please sign the release form below. Suitable credit will be given in the use of the material; if you have a preferred statement, please indicate it below. If you are not the copyright controller, please indicate to whom I should apply. Your prompt consideration of this request is appreciated.

Yours very truly,

  
\_\_\_\_\_  
Requestor

I (we) grant the permission requested above.

By: \_\_\_\_\_ Date: \_\_\_\_\_

| Taylor and Francis Use Only |  |
|-----------------------------|--|
| Cat number:                 |  |
| Chapter:                    |  |
| Contributor:                |  |

**Important: Please submit the completed PVF and copies of the CPR together with your final manuscript**
