# Supplementary material for: TF-IDF Feature-Based Spam Filtering of Mobile SMS Using Machine Learning Approach
Source: Preprints.org preprint supplement (doi:10.20944/preprints202109.0251.v1), 2021-09-15
Supplement: Supplementary file 4 [file supplementary]

Archive with 27 entries (26 files):
- BIM_ 1200/booktabs.sty
- BIM_ 1200/epsfig.sty
- BIM_ 1200/figure/
- BIM_ 1200/figure/comparative bar.png
- BIM_ 1200/figure/new flowchart.JPG
- BIM_ 1200/figure/new paper flowchart.png
- BIM_ 1200/figure/process.png
- BIM_ 1200/figure/roc.png
- BIM_ 1200/figure/roc_auc.png
- BIM_ 1200/figure/roc_hist.png
- BIM_ 1200/figure/stemming.png
- BIM_ 1200/figure/tf_idf.png
- BIM_ 1200/figure/tf_idf_score.png
- BIM_ 1200/figure/tf_idf_stemming_score.png
- BIM_ 1200/graph1.eps
- BIM_ 1200/graph2.eps
- BIM_ 1200/interact.cls
- BIM_ 1200/interactapasample.bib
- BIM_ 1200/interactapasample.pdf
- BIM_ 1200/main.tex
- BIM_ 1200/natbib.sty
- BIM_ 1200/PVF-and-CPR_1200.pdf
- BIM_ 1200/reviewers comments - 1200.pdf
- BIM_ 1200/rotating.sty
- BIM_ 1200/subfig.sty
- BIM_ 1200/tailor_main.tex
- BIM_ 1200/TF-IDF Feature-based Spam Filtering of Mobile SMS using MachineLearning Approach.pdf
