# Supplementary material for: TF-IDF Feature-Based Spam Filtering of Mobile SMS Using Machine Learning Approach
Source: Preprints.org preprint supplement (doi:10.20944/preprints202109.0251.v1), 2021-09-15
Supplement: Supplementary file 4 [file supplementary › BIM_ 1200/rotating.sty]

%%
%% This is file `rotating.sty',
%% generated with the docstrip utility.
%%
%% The original source files were:
%%
%% rotating.dtx  (with options: `package')
%% Copyright (C) 1994 Sebastian Rahtz and Leonor Barroca. All
%% rights reserved.  Permission is granted to to customize the
%% declarations in this file to serve the needs of your installation.
%% However, no permission is granted to distribute a modified version of
%% this file under its original name.
%% 
\def\RInfo{1997/09/26, v2.13}
%% File: rotating.dtx Copyright (C) 1995 Sebastian Rahtz and Leonor Barroca
\ProvidesPackage{rotating}[\RInfo\space Rotation package]
\NeedsTeXFormat{LaTeX2e}
\newif\if@rot@twoside
\DeclareOption{clockwise}{% this is for compatibility
 \AtBeginDocument{\setkeys{Grot}{units=360}}%
}
\DeclareOption{counterclockwise}{%
 \AtBeginDocument{\setkeys{Grot}{units=-360}}%
}
\DeclareOption{figuresleft}{%
  \@rot@twosidefalse
  \def\rot@LR{0}%
}
\DeclareOption{figuresright}{%
 \@rot@twosidefalse
 \def\rot@LR{-1}%
}
\DeclareOption*{\PassOptionsToPackage{\CurrentOption}{graphics}}
\ExecuteOptions{clockwise}
\if@twoside
  \@rot@twosidetrue
\else
  \@rot@twosidefalse
\fi
\def\rot@LR{-1}
\ProcessOptions
\RequirePackage{graphicx}
\RequirePackage{ifthen}
\def\rotdriver#1{\makeatletter\input{#1.def}\makeatother}
\newcounter{r@tfl@t}
\setcounter{r@tfl@t}{0}
\def\sideways{%
  \Grot@setangle{90}%
  \setbox\z@\hbox\bgroup\ignorespaces}
\def\endsideways{%
  \unskip\egroup
  \Grot@x\z@
  \Grot@y\z@
  \Grot@box
}
\def\turn#1{%
  \Grot@setangle{#1}%
  \setbox\z@\hbox\bgroup\ignorespaces}
\def\endturn{%
  \unskip\egroup
  \Grot@x\z@
  \Grot@y\z@
  \Grot@box
}
\def\rotate#1{%
  \Grot@setangle{#1}%
  \setbox\z@\hbox\bgroup\ignorespaces}
\def\endrotate{%
  \unskip\egroup
  \Grot@x\z@
  \Grot@y\z@
  \wd0\z@\dp0\z@\ht0\z@
  \Grot@box
}
\def\turnbox#1#2{%
  \Grot@setangle{#1}%
  \setbox\z@\hbox{{#2}}%
  \Grot@x\z@\Grot@y\z@
  \wd0\z@\dp0\z@\ht0\z@
  \Grot@box
}
\newsavebox\rot@float@box
\def\@rotfloat#1{%
  \@ifnextchar[%
    {\@xrotfloat{#1}}%
    {\edef\@tempa{\noexpand\@xrotfloat{#1}[\csname fps@#1\endcsname]}\@tempa}%
}
\def\@xrotfloat#1[#2]{%
  \@float{#1}[#2]%
  \begin{lrbox}\rot@float@box
  \begin{minipage}\textheight
 }
\def\end@rotfloat{%
   \end{minipage}\end{lrbox}%
   \global\addtocounter{r@tfl@t}{1}%
   \rot@label{RF\ther@tfl@t}%
   \message{Adding sideways figure on }%
   \def\R@@page{\pageref{RF\ther@tfl@t}}%
   \wd\rot@float@box\z@
   \ht\rot@float@box\z@
   \dp\rot@float@box\z@
   \vbox to \textheight{%
    \setkeys{Grot}{units=360}%
    \if@rot@twoside
      \def\R@@page{\pageref{RF\ther@tfl@t}}%
    \else
      \let\R@@page\rot@LR
    \fi
    \ifthenelse{\isodd{\R@@page}}{%
    \message{right hand page}%
    \vfill
    \centerline{\rotatebox{90}{\box\rot@float@box}}%
         }{%
    \message{left hand page}%
    \vfill    \centerline{\rotatebox{90}{\box\rot@float@box}}%
         }%
 }%
   \end@float
}
\def\sidewaysfigure{\@rotfloat{figure}}
\let\endsidewaysfigure\end@rotfloat
\def\sidewaystable{\@rotfloat{table}}
\let\endsidewaystable\end@rotfloat
\def\@rotdblfloat{%
  \if@twocolumn\let\reserved@a\@rotdbflt\else\let\reserved@a\@rotfloat\fi
  \reserved@a}
\def\@rotdbflt#1{\@ifnextchar[{\@rotxdblfloat{#1}}{\@rotxdblfloat{#1}[tp]}}
\def\@rotxdblfloat#1[#2]{%
  \hsize\textwidth\linewidth\textwidth
  \@float{#1}[#2]%
  \begin{lrbox}\rot@float@box
  \begin{minipage}\textheight
}
\def\end@rotdblfloat{%
   \end{minipage}\end{lrbox}%
   \global\addtocounter{r@tfl@t}{1}%
   \rot@label{RF\ther@tfl@t}%
   \message{Adding sideways figure on }%
   \def\R@@page{\pageref{RF\ther@tfl@t}}%
   \@tempdima\ht\rot@float@box
   \advance\@tempdima by \dp\rot@float@box
\typeout{BOX wd: \the\wd\rot@float@box, ht: \the\ht\rot@float@box, dp: 
\the\dp\rot@float@box: so shift by .5 of \the\@tempdima}%
   \wd\rot@float@box\z@
   \ht\rot@float@box\z@
   \dp\rot@float@box\z@
   \vbox to \textheight{%
    \setkeys{Grot}{units=360}%
    \if@rot@twoside
      \def\R@@page{\pageref{RF\ther@tfl@t}}%
    \else
      \let\R@@page\rot@LR
    \fi
    \ifthenelse{\isodd{\R@@page}}{%
    \message{right hand page}%
    \hbox to \textwidth{\hfill\rotatebox{-90}{\box\rot@float@box}\hfill}%
     \vfill
         }{%
    \message{left hand page}%
    \vfill
    \hbox to\textwidth{\hfill\rotatebox{90}{\box\rot@float@box}\hfill}%
         }%
 }%
   \end@dblfloat
}
\newenvironment{sidewaystable*}
               {\@rotdblfloat{table}}
               {\end@rotdblfloat}
\newenvironment{sidewaysfigure*}
               {\@rotdblfloat{figure}}
               {\end@rotdblfloat}

\long\def \r@protected@write#1#2#3{%
      \begingroup
       \let\therpage\relax
       #2%
       \let\protect\@unexpandable@protect
       \edef\reserved@a{\write#1{#3}}%
       \reserved@a
      \endgroup
      \if@nobreak\ifvmode\nobreak\fi\fi
}
\def\therpage{\arabic{page}}
\def\rot@label#1{\@bsphack
  \r@protected@write\@auxout{}%
         {\string\newlabel{#1}{{\@currentlabel}{\therpage}}}%
  \@esphack}
\def\rotcaption{\refstepcounter\@captype\@dblarg{\@rotcaption\@captype}}
\long\def\@rotcaption#1[#2]#3{%
\addcontentsline{\csname ext@#1\endcsname}{#1}{%
 \protect\numberline{\csname the#1\endcsname}{\ignorespaces #2}}%
  \par
  \begingroup
    \@parboxrestore
    \normalsize
    \@makerotcaption{\csname fnum@#1\endcsname}{#3}%
  \endgroup}
\long\def\@makerotcaption#1#2{%
 \setbox\@tempboxa\hbox{#1: #2}%
 \ifdim \wd\@tempboxa > .8\vsize
    \rotatebox{90}{%
    \begin{minipage}{.8\textheight}\end{minipage}%
    }\par
 \else%
    \rotatebox{90}{\box\@tempboxa}%
 \fi
 \hspace{12pt}%
}
\endinput
%%
%% End of file `rotating.sty'.
