# Supplementary figures and images for: TF-IDF Feature-Based Spam Filtering of Mobile SMS Using Machine Learning Approach
Source: Preprints.org preprint supplement (doi:10.20944/preprints202109.0251.v1), 2021-09-15

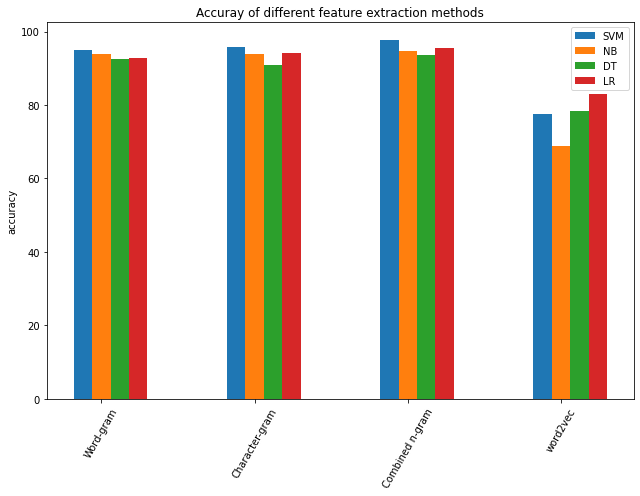

Supplement: Supplementary file 4 [file supplementary › BIM_ 1200/figure/comparative bar.png]

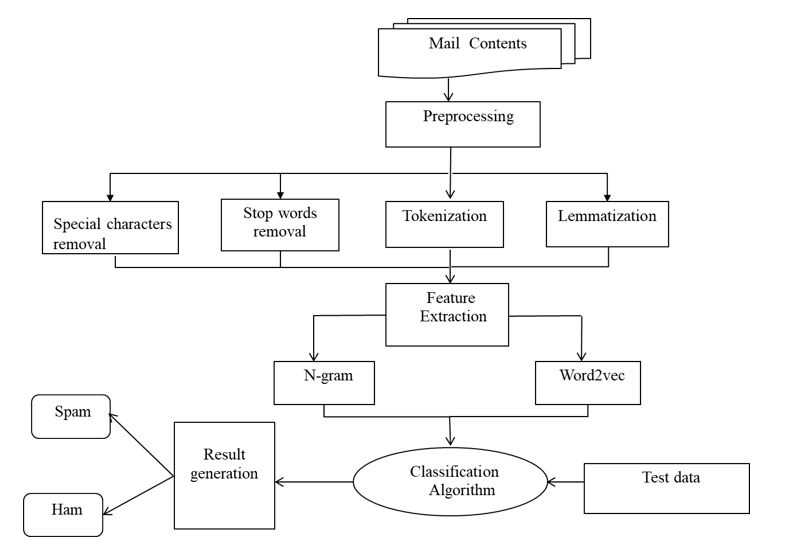

Supplement: Supplementary file 4 [file supplementary › BIM_ 1200/figure/new flowchart.JPG]

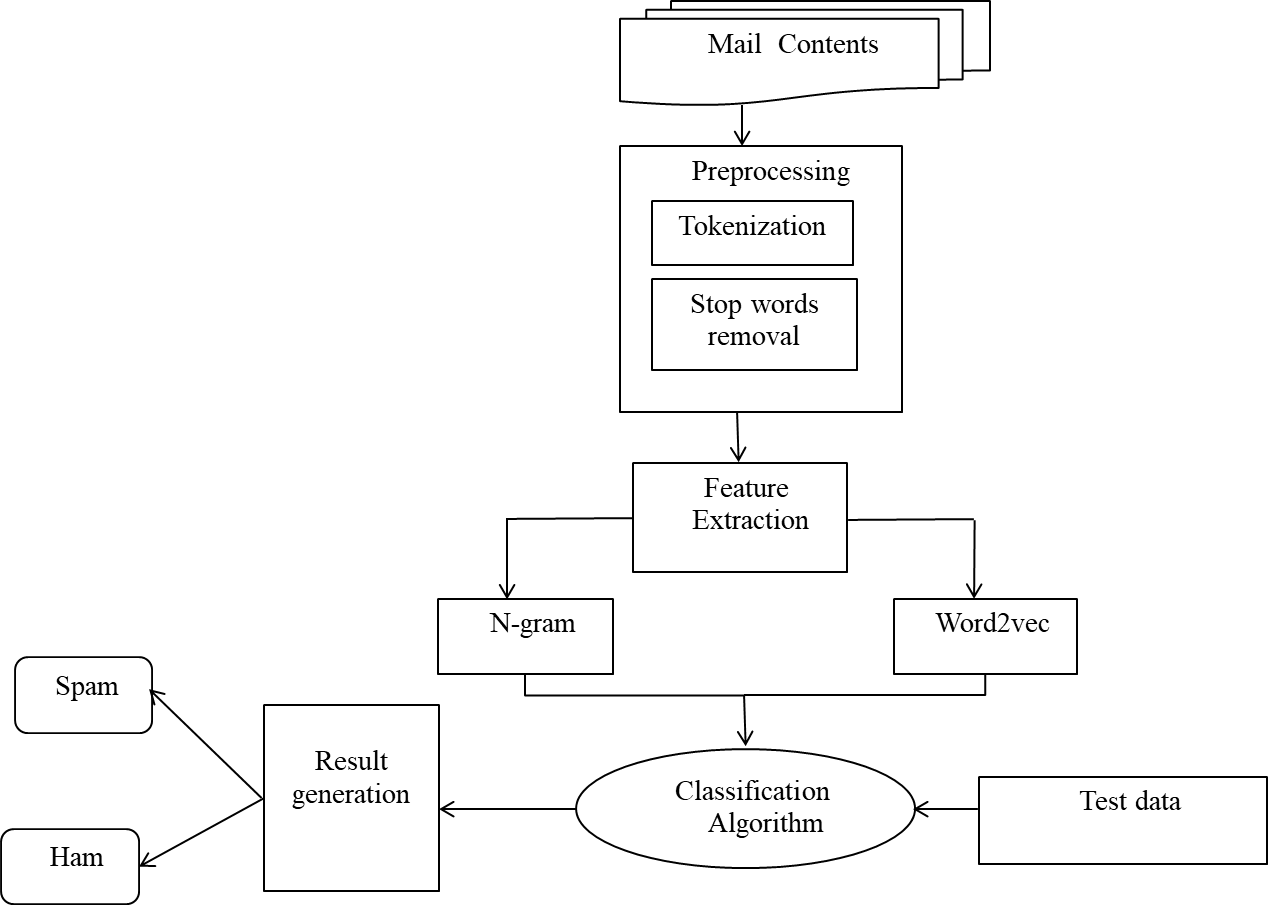

Supplement: Supplementary file 4 [file supplementary › BIM_ 1200/figure/new paper flowchart.png]

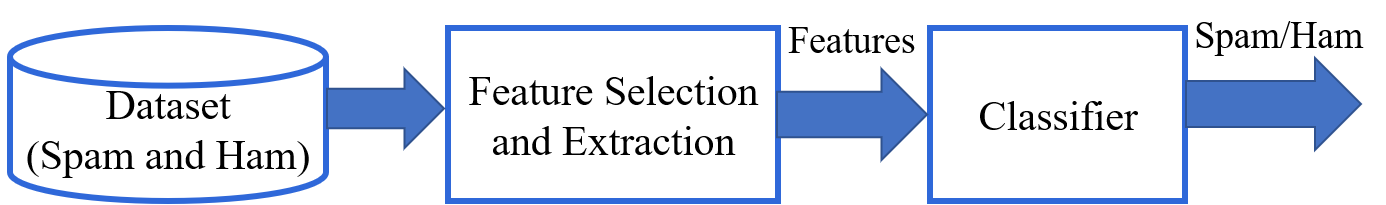

Supplement: Supplementary file 4 [file supplementary › BIM_ 1200/figure/process.png]

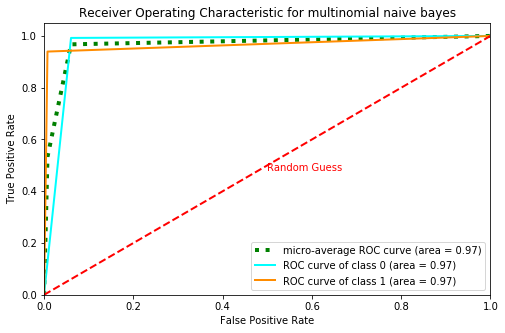

Supplement: Supplementary file 4 [file supplementary › BIM_ 1200/figure/roc.png]

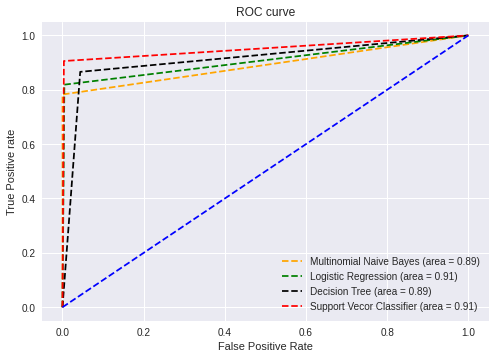

Supplement: Supplementary file 4 [file supplementary › BIM_ 1200/figure/roc_auc.png]

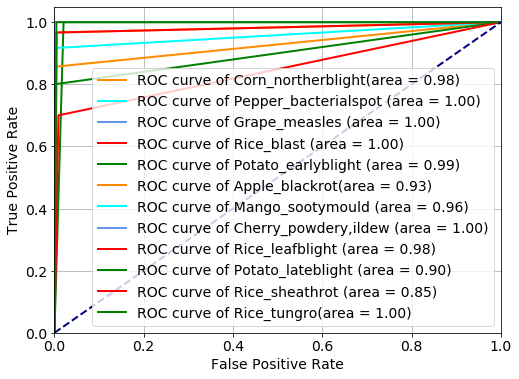

Supplement: Supplementary file 4 [file supplementary › BIM_ 1200/figure/roc_hist.png]

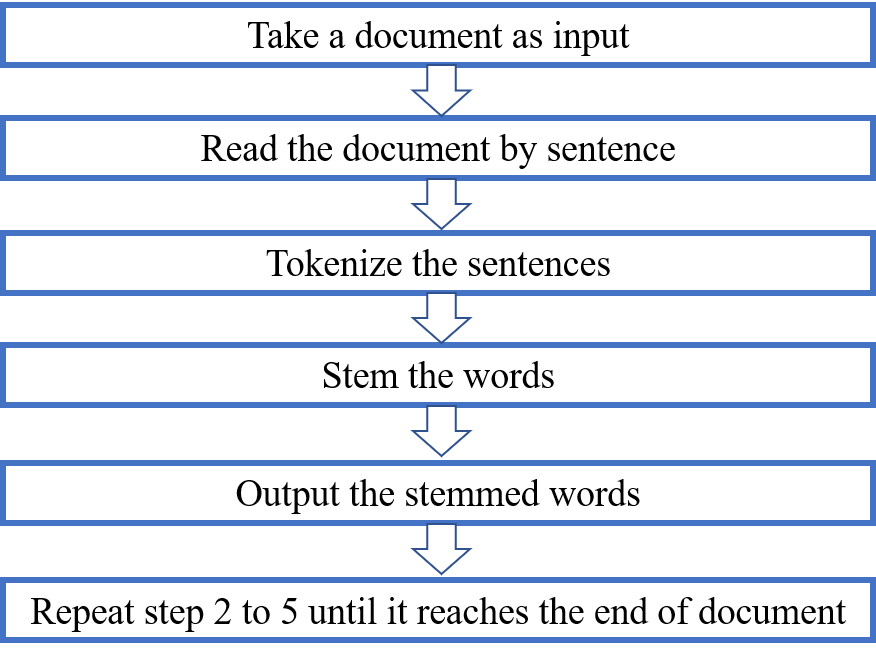

Supplement: Supplementary file 4 [file supplementary › BIM_ 1200/figure/stemming.png]

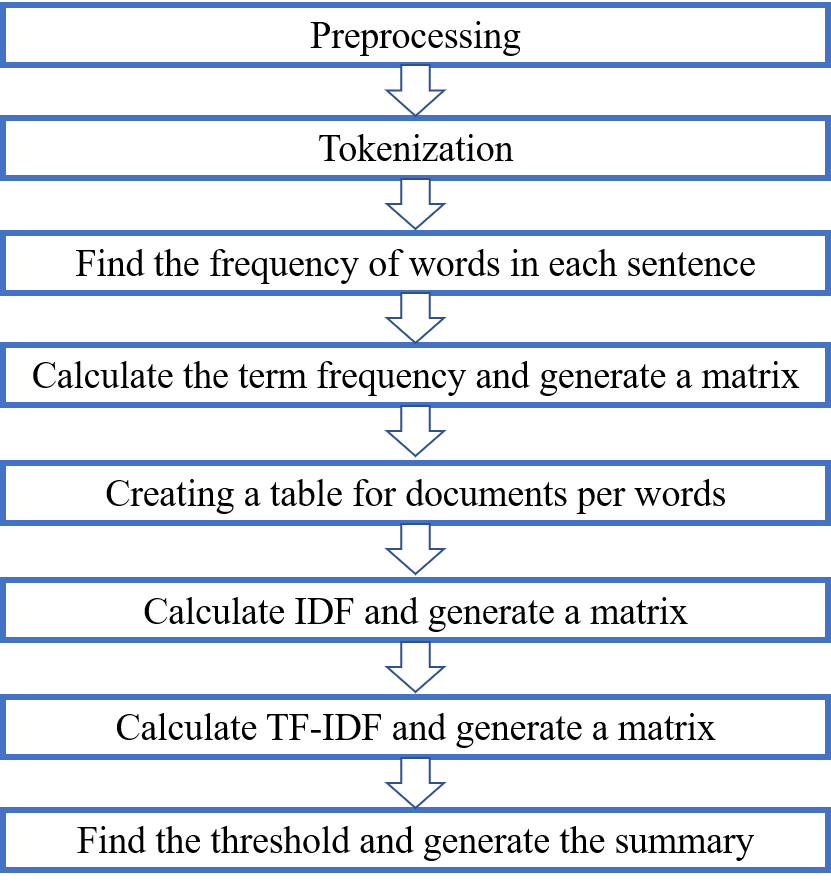

Supplement: Supplementary file 4 [file supplementary › BIM_ 1200/figure/tf_idf.png]

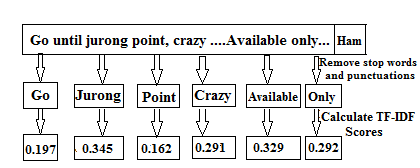

Supplement: Supplementary file 4 [file supplementary › BIM_ 1200/figure/tf_idf_score.png]

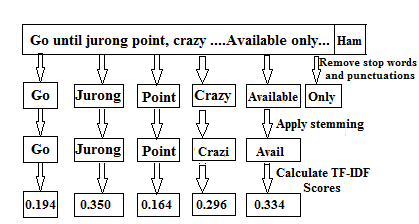

Supplement: Supplementary file 4 [file supplementary › BIM_ 1200/figure/tf_idf_stemming_score.png]
